# Supplementary material for: Phospholipase C β3 deficiency leads to macrophage hypersensitivity to apoptotic induction and reduction of atherosclerosis in mice
Source: JCI journal article supplement (doi:10.1172/jci33139), 2008-01-02
Supplement: sd1 [file 1]

Supplementary Figure S1

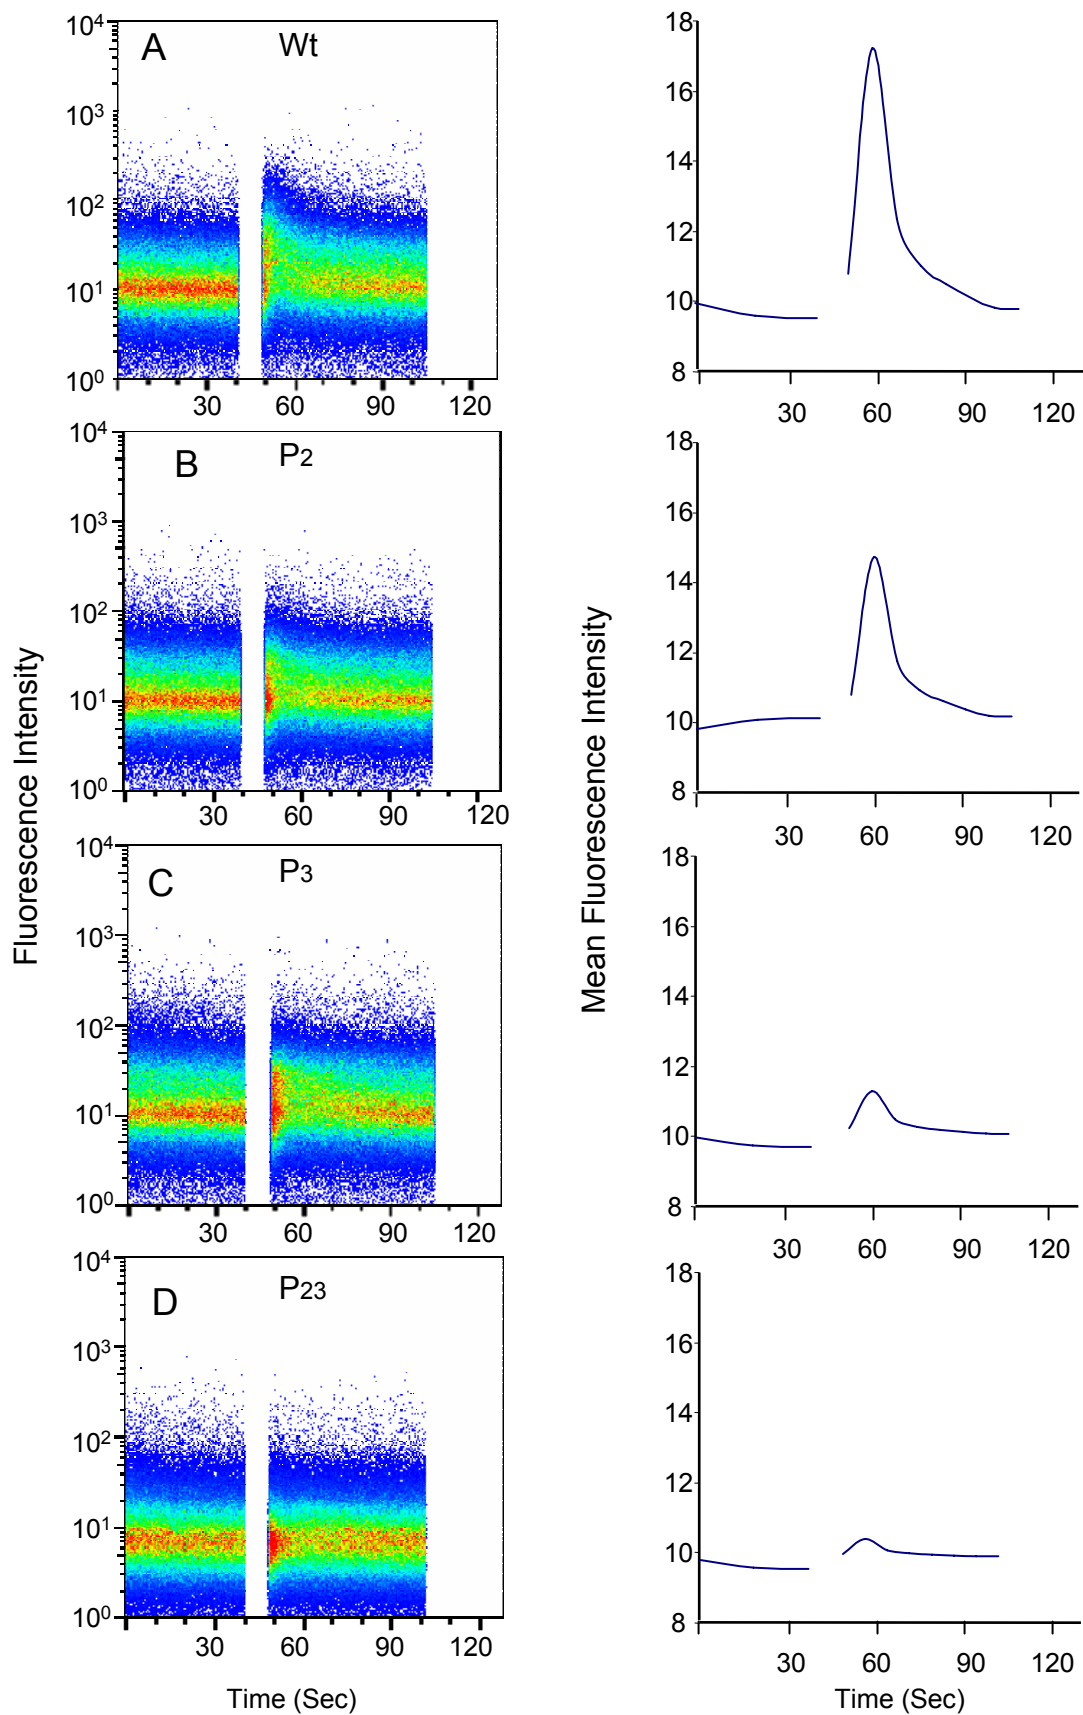

## Supplementary Figure S2

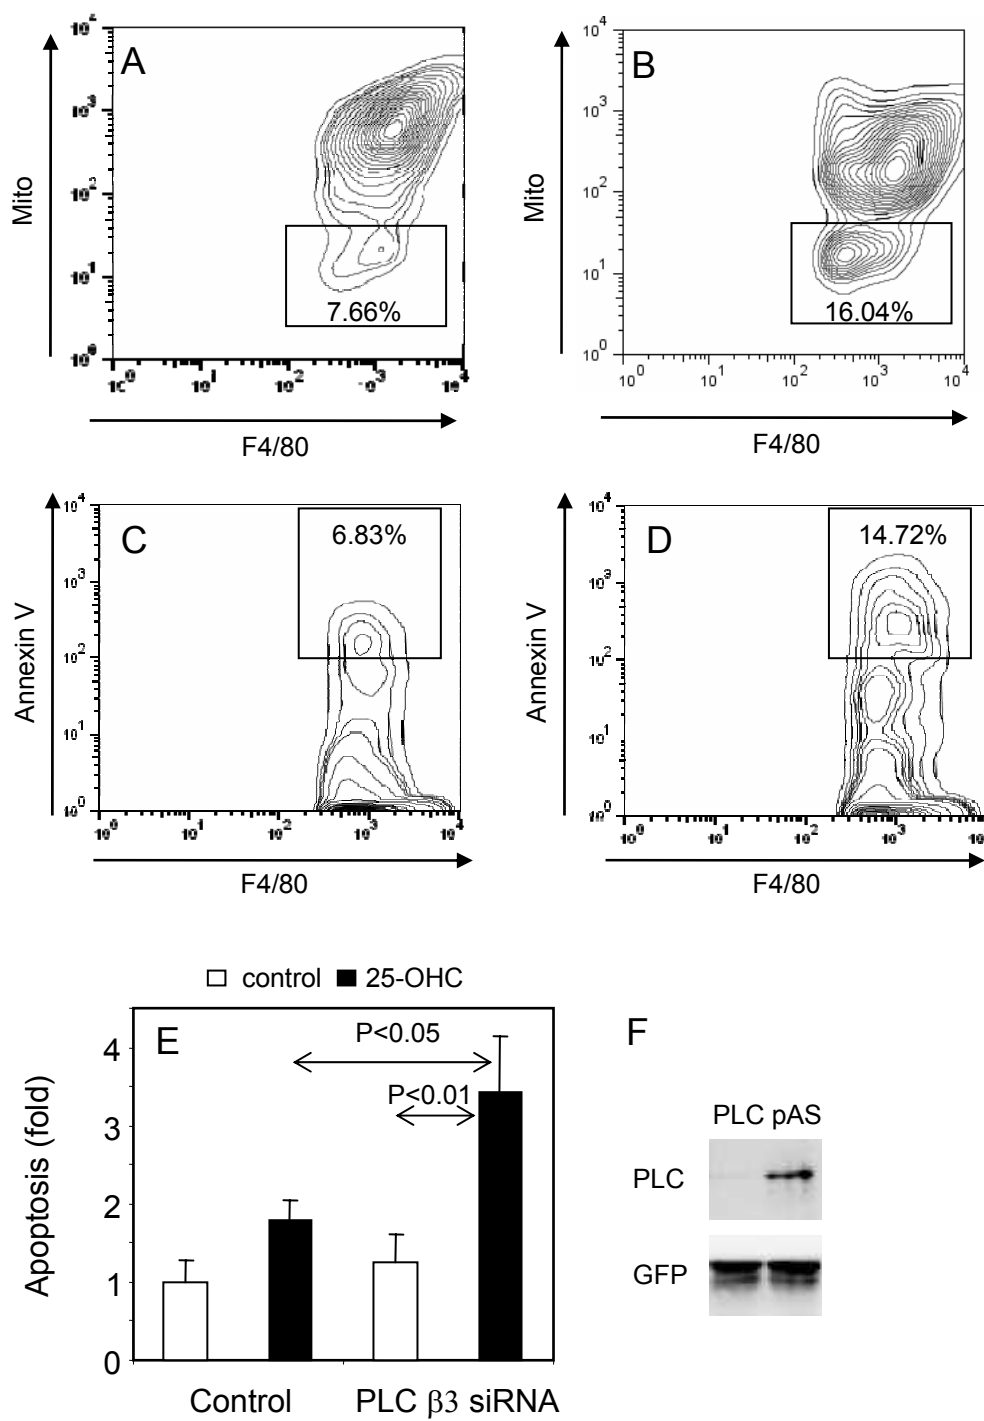

Supplementary Figure S3

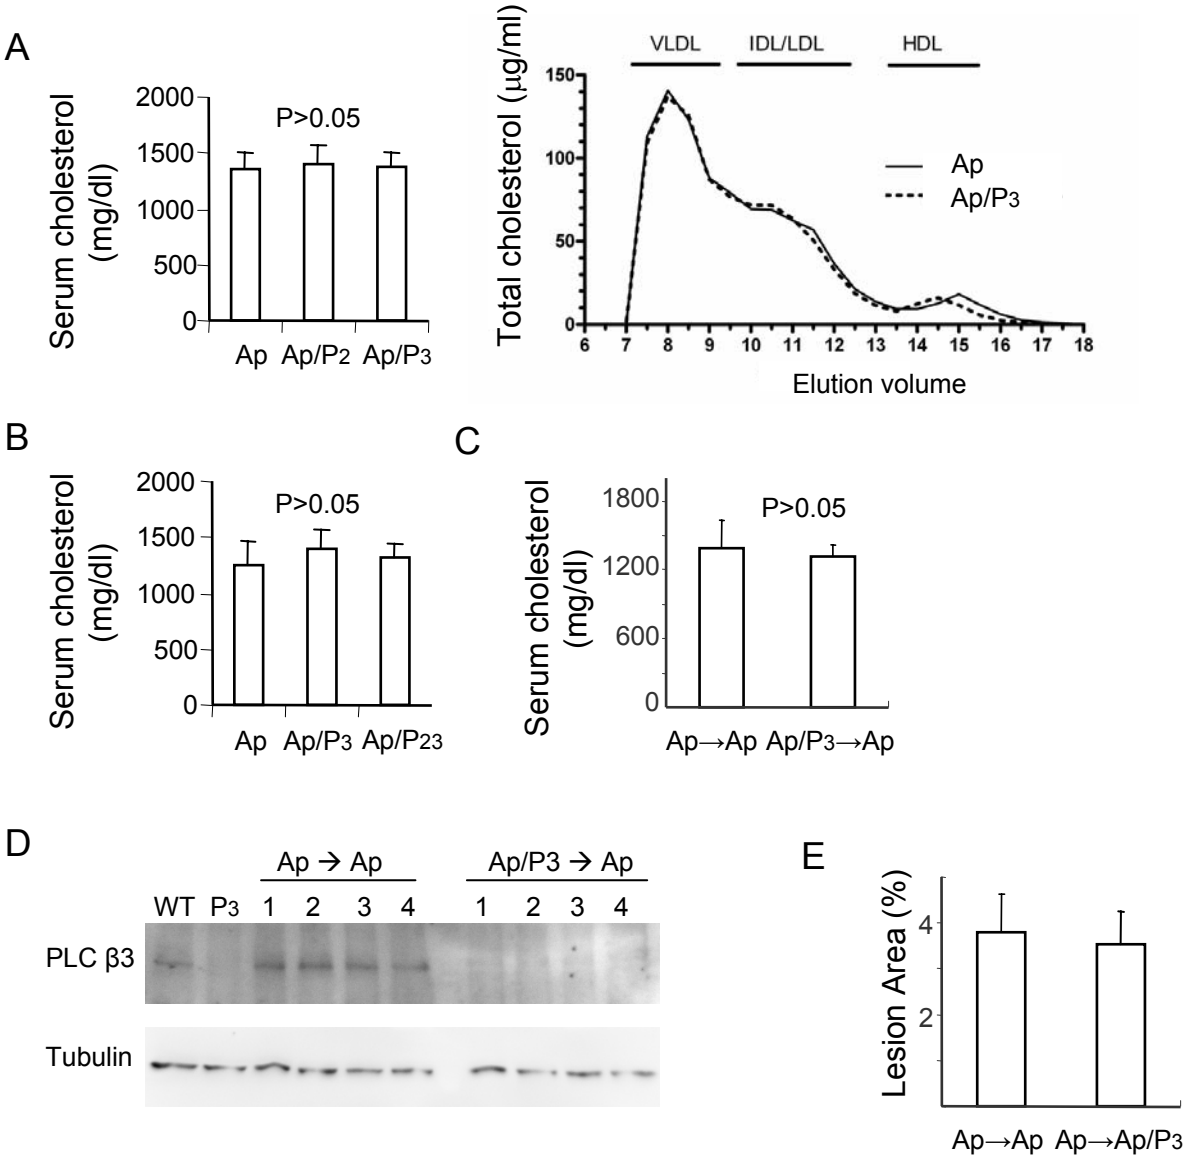

**Supplementary Figure S4**

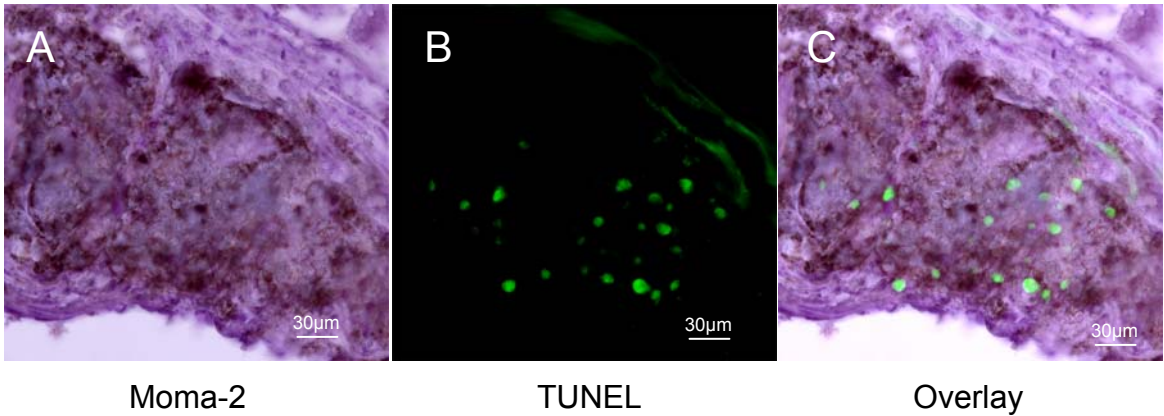

## **SUPPLEMENTARY FIGURE LEGENDS:**

**Figure S1. Flow cytometric analysis of intracellular calcium levels of cells labeled with Fluo-3.** Panels **A-D** are the raw flow cytometric data. From these data, the mean fluorescent intensity (MFI) in one second was calculated by the flowcytometry software FlowJo, which is shown in **E-H**. The differences between the peak MFI and basal MFI are shown in Fig. 1A, and the one for wildtype macrophages is taken as 100%.

**Figure S2. Representative flow cytometry charts and effect of PLC  $\beta 3$  expression on RAW264.7 cell apoptosis.** **A-D**) Representative flow cytometry charts for Fig 2B (**A** & **B**) and for Fig. 2C (**C** and **D**). **E**) RAW264.7 Cells were transfected with a control plasmid or a plasmid expressing PLC  $\beta 3$  siRNA, both of which also express GFP. Cells were treated with 30 ug/ml OHC, stained with the Mito-Probe dye, and analyzed by FACS 48 hours after transfection. GFP-positive cells were gated for apoptosis analysis. **F**) Cells were cotransfected with PLC  $\beta 3$  siRNA expressing or control vector and PLC  $\beta 3$  cDNA for two days. The levels of PLC  $\beta 3$  were detected by Western analysis using an anti-PLC  $\beta 3$  antibody.

**Figure S3. Lipid profiling and additional data for adoptive bone marrow transfer experiments.** **A-C**) Lipid profiles for mice described in Fig. 1C, E, & F, respectively. A representative chromatogram for FPLC analysis lipid profile is shown In **A**. **D**) Bone marrow cells from a wildtype, a PLC  $\beta 3$ -null, or mice receiving apoE-null or ApoE/PLC  $\beta 3$ -null bone marrows were analyzed by Western blotting using an anti-PLC  $\beta 3$  antibody.

B-tubulin was detected as an internal control. **E)** Quantification of atherosclerotic lesions of apoE-null and apoE/PLC  $\beta$ 3-null mice (n=7) receiving bone marrows from ApoE-null fed on HFD for 14 weeks were analyzed for lesion areas by *en Face* staining of aortas.

**Figure S4. Magnified images of TUNEL and Moma-2 staining of two adjacent sections from PLC  $\beta$ 3-null mice.** Panel A was also counterstained with Hematoxylin.
